# Supplementary material for: Evaluation of Organic Matter Contribution Using Absorbance and Chromatographic Parameters in Lake Paldang, Republic of Korea
Source: MDPI journal article supplement (doi:10.3390/agronomy13112766), 2023-11-04
Supplement: s1 [file s1]

**Supplementary Information:**

**Evaluation of Organic Matter Contribution Using  
Absorbance and Chromatographic Parameters in Lake  
Paldang, Republic of Korea**

Yeon Jung Cho, Ki Seon Seong, Myeong Seop Byeon, Taegu Kang and Jong Kwon Im \*

Han River Environment Research Center, National Institute of Environmental Research,  
42, Dumulmeori-gil 68beon-gil, Yangseo-myeon, Yangpyeong-gun 12585, Gyeonggi-do,  
Republic of Korea; wh4502@korea.kr (Y.J.C.); sks161128@naver.com (K.S.S.);  
zacco@korea.kr (M.S.B.); taegu98@korea.kr (T.K.)

\* Correspondence: lim-jkjk@daum.net; Tel.: +82-31-770-7240

## **Table of Contents**

**Table S1.** Correlation coefficients for water Quality factor, absorbance and chromatographic parameters in PD.

**Table S2.** Correlation coefficients for water Quality factor, absorbance and chromatographic parameters in SB.

**Table S3.** Correlation coefficients for water Quality factor, absorbance and chromatographic parameters in GS.

**Table S4.** Correlation coefficients for water Quality factor, absorbance and chromatographic parameters in KK.

**Table S1** Correlation coefficients for water Quality factor, absorbance and chromatographic parameters in PD

| PD                | BOD     | TOC     | DOC     | Chl-a   | BOD/TOC | E2/E3   | E2/E4  | SR      | UV <sub>254</sub> | BP     | HS      | BB      | LMWN   | SUVA |
|-------------------|---------|---------|---------|---------|---------|---------|--------|---------|-------------------|--------|---------|---------|--------|------|
| TOC               | 0.421*  |         |         |         |         |         |        |         |                   |        |         |         |        |      |
| DOC               | 0.138   | 0.872** |         |         |         |         |        |         |                   |        |         |         |        |      |
| Chl-a             | 0.784** | 0.625** | 0.331   |         |         |         |        |         |                   |        |         |         |        |      |
| BOD/TOC           | 0.854** | -0.081  | -0.311  | 0.480*  |         |         |        |         |                   |        |         |         |        |      |
| E2/E3             | -0.034  | -0.400  | -0.376  | -0.194  | 0.221   |         |        |         |                   |        |         |         |        |      |
| E2/E4             | 0.133   | 0.100   | -0.011  | 0.197   | 0.091   | 0.548** |        |         |                   |        |         |         |        |      |
| SR                | 0.011   | -0.358  | -0.217  | -0.195  | 0.194   | -0.309  | -0.410 |         |                   |        |         |         |        |      |
| UV <sub>254</sub> | -0.053  | 0.759** | 0.765** | 0.329   | -0.444  | -0.496  | -0.084 | -0.186  |                   |        |         |         |        |      |
| BP                | 0.272   | -0.293  | -0.207  | -0.176  | 0.485** | 0.088   | -0.156 | 0.575** | -0.448            |        |         |         |        |      |
| HS                | 0.172   | 0.763** | 0.816** | 0.316   | -0.187  | -0.445  | -0.106 | -0.024  | 0.800**           | 0.017  |         |         |        |      |
| BB                | 0.295   | 0.795** | 0.762** | 0.485** | -0.088  | -0.347  | -0.008 | -0.227  | 0.810**           | -0.076 | 0.816** |         |        |      |
| LMWN              | 0.046   | 0.711** | 0.645** | 0.447** | -0.372  | -0.374  | 0.109  | -0.469  | 0.827**           | -0.557 | 0.607** | 0.775** |        |      |
| SUVA              | -0.077  | 0.686** | 0.568** | 0.304   | -0.459  | -0.240  | 0.052  | -0.665  | 0.770**           | -0.718 | 0.458** | 0.607** | 0.806* |      |

\**p*-value<0.05, \*\**p*-value<0.01

**Table S2** Correlation coefficients for water Quality factor, absorbance and chromatographic parameters in SB

| SB                | BOD     | TOC     | DOC     | Chl-a  | BOD/TOC | E2/E3   | E2/E4  | SR      | UV <sub>254</sub> | BP     | HS     | BB      | LMWN    | SUVA |
|-------------------|---------|---------|---------|--------|---------|---------|--------|---------|-------------------|--------|--------|---------|---------|------|
| TOC               | 0.604** |         |         |        |         |         |        |         |                   |        |        |         |         |      |
| DOC               | 0.215   | 0.786** |         |        |         |         |        |         |                   |        |        |         |         |      |
| Chl-a             | 0.585** | 0.678** | 0.549** |        |         |         |        |         |                   |        |        |         |         |      |
| BOD/TOC           | 0.690** | -0.144  | -0.383  | 0.126  |         |         |        |         |                   |        |        |         |         |      |
| E2/E3             | -0.058  | -0.475  | -0.613  | -0.195 | 0.340   |         |        |         |                   |        |        |         |         |      |
| E2/E4             | -0.246  | -0.113  | -0.126  | -0.141 | -0.219  | 0.524** |        |         |                   |        |        |         |         |      |
| SR                | 0.270   | 0.213   | 0.154   | 0.075  | 0.152   | -0.677  | -0.475 |         |                   |        |        |         |         |      |
| UV <sub>254</sub> | -0.131  | 0.455*  | 0.821** | 0.244  | -0.508  | -0.578  | -0.191 | -0.064  |                   |        |        |         |         |      |
| BP                | 0.638** | 0.104   | -0.217  | 0.012  | 0.691** | -0.086  | -0.285 | 0.630** | -0.520            |        |        |         |         |      |
| HS                | 0.475*  | 0.727** | 0.768** | 0.446* | -0.007  | -0.632  | -0.416 | 0.390*  | 0.592**           | 0.132  |        |         |         |      |
| BB                | 0.127   | 0.459*  | 0.691** | 0.334  | -0.181  | -0.261  | -0.109 | -0.170  | 0.756**           | -0.259 | 0.503* |         |         |      |
| LMWN              | -0.242  | 0.382   | 0.618** | 0.336  | -0.640  | -0.205  | 0.053  | -0.275  | 0.712**           | -0.683 | 0.262  | 0.635** |         |      |
| SUVA              | -0.430  | 0.112   | 0.495** | 0.078  | -0.608  | -0.070  | 0.144  | -0.598  | 0.741**           | -0.840 | 0.143  | 0.483*  | 0.701** |      |

\**p-value*<0.05, \*\**p-value*<0.01

**Table S3** Correlation coefficients for water Quality factor, absorbance and chromatographic parameters in GS

| GS                | BOD     | TOC     | DOC     | Chl-a   | BOD/TOC | E2/E3   | E2/E4  | SR      | UV <sub>254</sub> | BP     | HS      | BB      | LMWN    | SUVA |
|-------------------|---------|---------|---------|---------|---------|---------|--------|---------|-------------------|--------|---------|---------|---------|------|
| TOC               | 0.064   |         |         |         |         |         |        |         |                   |        |         |         |         |      |
| DOC               | -0.110  | 0.889** |         |         |         |         |        |         |                   |        |         |         |         |      |
| Chl-a             | 0.851** | 0.065   | -0.182  |         |         |         |        |         |                   |        |         |         |         |      |
| BOD/TOC           | 0.926** | -0.286  | -0.415  | 0.747** |         |         |        |         |                   |        |         |         |         |      |
| E2/E3             | 0.344   | -0.569  | -0.599  | 0.374   | 0.521** |         |        |         |                   |        |         |         |         |      |
| E2/E4             | -0.073  | -0.261  | -0.244  | 0.027   | -0.011  | 0.652** |        |         |                   |        |         |         |         |      |
| SR                | 0.299   | -0.104  | -0.052  | 0.152   | 0.333   | -0.311  | -0.516 |         |                   |        |         |         |         |      |
| UV <sub>254</sub> | -0.429  | 0.690** | 0.745** | -0.490  | -0.614  | -0.717  | -0.268 | -0.249  |                   |        |         |         |         |      |
| BP                | 0.782** | -0.039  | -0.130  | 0.614** | 0.757** | 0.204   | -0.155 | 0.583** | -0.473            |        |         |         |         |      |
| HS                | -0.019  | 0.781** | 0.815** | -0.194  | -0.259  | -0.552  | -0.272 | 0.038   | 0.785**           | -0.046 |         |         |         |      |
| BB                | -0.129  | 0.588** | 0.630** | -0.265  | -0.274  | -0.479  | -0.166 | -0.219  | 0.842**           | -0.163 | 0.680** |         |         |      |
| LMWN              | -0.507  | 0.392*  | 0.476*  | -0.519  | -0.595  | -0.403  | -0.012 | -0.539  | 0.826**           | -0.656 | 0.481*  | 0.774** |         |      |
| SUVA              | -0.619  | 0.539** | 0.539** | -0.580  | -0.757  | -0.622  | -0.180 | -0.447  | 0.846**           | -0.684 | 0.456*  | 0.597** | 0.759** |      |

\**p*-value<0.05, \*\**p*-value<0.01

**Table S4** Correlation coefficients for water Quality factor, absorbance and chromatographic parameters in KK

| KK                | BOD     | TOC     | DOC     | Chl-a   | BOD/TOC | E2/E3   | E2/E4  | SR      | UV <sub>254</sub> | BP      | HS      | BB      | LMWN  | SUVA |
|-------------------|---------|---------|---------|---------|---------|---------|--------|---------|-------------------|---------|---------|---------|-------|------|
| TOC               | 0.668** |         |         |         |         |         |        |         |                   |         |         |         |       |      |
| DOC               | 0.285   | 0.829** |         |         |         |         |        |         |                   |         |         |         |       |      |
| Chl-a             | 0.827** | 0.597** | 0.284   |         |         |         |        |         |                   |         |         |         |       |      |
| BOD/TOC           | 0.952** | 0.443*  | 0.041   | 0.788** |         |         |        |         |                   |         |         |         |       |      |
| E2/E3             | 0.001   | -0.370  | -0.406  | 0.026   | 0.068   |         |        |         |                   |         |         |         |       |      |
| E2/E4             | 0.542** | 0.040   | -0.185  | 0.562** | 0.555** | 0.873** |        |         |                   |         |         |         |       |      |
| SR                | 0.064   | 0.491** | 0.602** | 0.050   | -0.047  | -0.776  | -0.587 |         |                   |         |         |         |       |      |
| UV <sub>254</sub> | 0.058   | 0.370   | 0.280   | 0.067   | -0.005  | -0.611  | -0.448 | 0.471*  |                   |         |         |         |       |      |
| BP                | 0.562** | 0.751** | 0.736** | 0.376*  | 0.407*  | -0.299  | 0.053  | 0.546** | 0.090             |         |         |         |       |      |
| HS                | 0.427*  | 0.811** | 0.907** | 0.360   | 0.221   | -0.417  | -0.102 | 0.652** | 0.280             | 0.882** |         |         |       |      |
| BB                | 0.356   | 0.808** | 0.871** | 0.326   | 0.137   | -0.521  | -0.226 | 0.660** | 0.375*            | 0.771** | 0.878** |         |       |      |
| LMWN              | 0.187   | 0.582** | 0.563** | 0.353   | 0.032   | -0.361  | -0.159 | 0.331   | 0.685**           | 0.225   | 0.424*  | 0.606** |       |      |
| SUVA              | -0.202  | -0.015  | -0.029  | -0.295  | -0.245  | -0.405  | -0.401 | 0.050   | 0.487**           | -0.336  | -0.098  | -0.037  | 0.178 |      |

\**p*-value<0.05, \*\**p*-value<0.01
